# Supplementary material
Source: Springer Nature journal article supplement (https://www.springermedizin.de/resource/supplementary/12885_2010_2575_MOESM1_ESM.pdf/9462596)

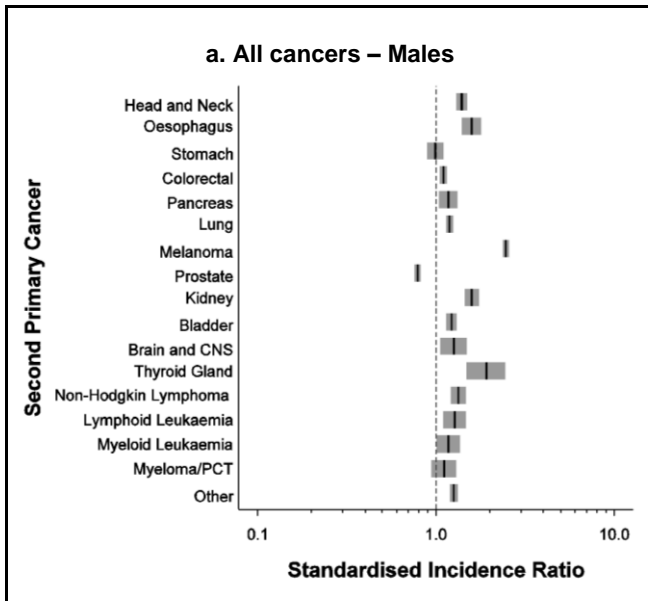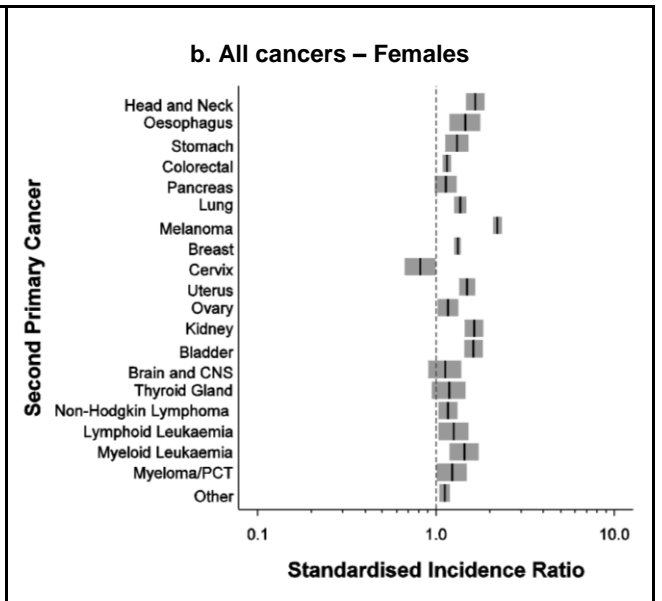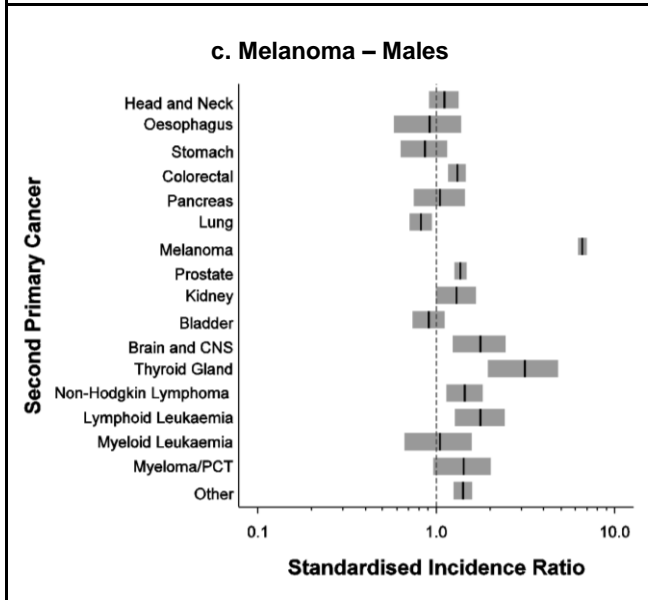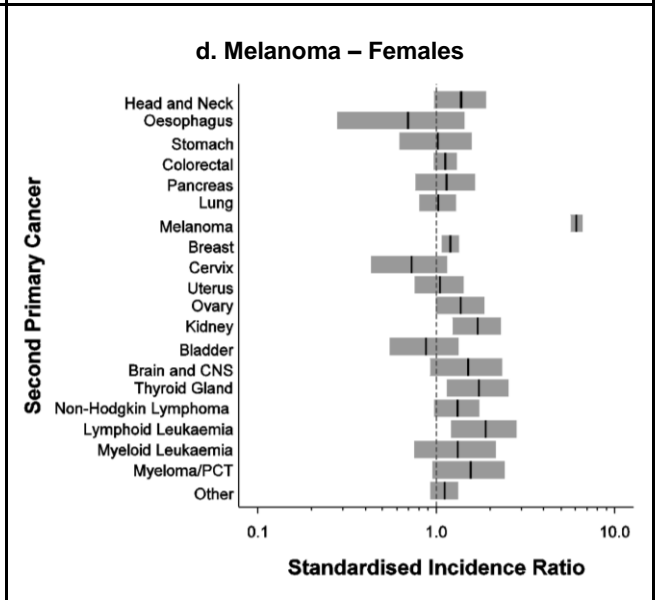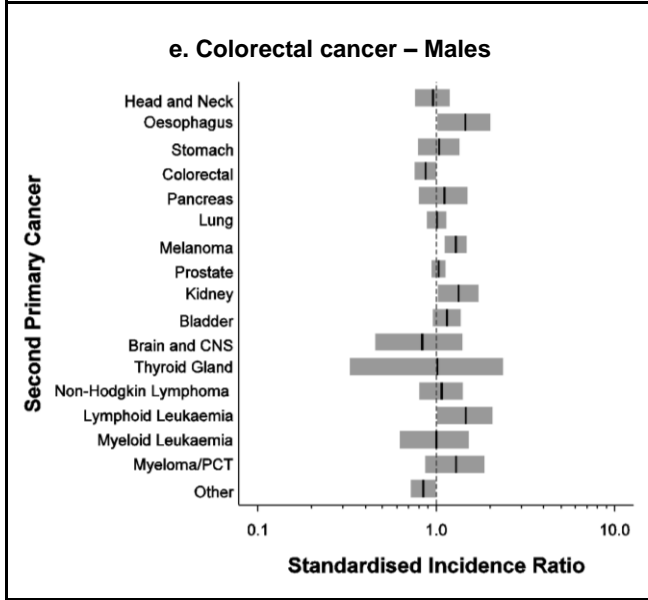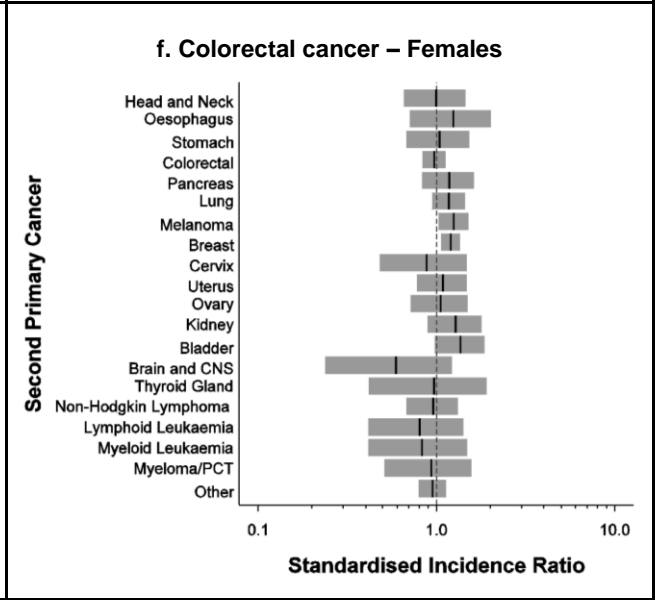

Supplement: MOESM1 [file 9462596]
